**Title:** Temperature seasonality and nutrient enrichment drive intra-annual community turnover in global grasslands

**Authors:** Magda Garbowski<sup>1,2</sup>, Elizabeth Boughton<sup>3</sup>, Anne Ebeling<sup>4</sup>, Philip Fay<sup>5</sup>, Yann Hautier<sup>6</sup>, Hanna Holz<sup>7</sup>, Anke Jentsch<sup>8</sup>, Stephanie Jurburg<sup>1,2</sup>, Emma Ladouceur<sup>1,2,9</sup>, Jason Martina<sup>10</sup>, Timothy Ohlert<sup>11,12</sup>, Xavier Raynaud<sup>13</sup>, Christiane Roscher<sup>1,2</sup>, Grégory Sonnier<sup>3</sup>, Pedro Maximiliano Tognetti<sup>14</sup>, Laura Yahdjian<sup>14</sup>, Peter Wilfahrt<sup>15</sup>, Stan Harpole<sup>1,2,7</sup>

**\* Corresponding author email:** [Magda.Garbowski@uwyo.edu](mailto:Magda.Garbowski@uwyo.edu)

1) German Centre for Integrative Biodiversity Research (iDiv) Leipzig, Germany

2) Department of Physiological Diversity, Helmholtz Centre for Environmental Research - UFZ Leipzig, Germany

3) Archbold Biological Station, Venus, Florida, USA

4) University Jena, Institute of Ecology and Evolution, Jena, Germany

5) USDA-ARS Grassland Soil and Water Lab, Temple, Texas, USA

6) Ecology and Biodiversity Group, Department of Biology, Utrecht University, Utrecht, The Netherlands

7) Martin Luther University Halle-Wittenberg, Halle (Saale), Germany

8) Department of Disturbance Ecology and Vegetation Dynamics, Bayreuth Center of Ecology and Environmental Research (BayCEER), University of Bayreuth, Bayreuth, Germany

9) Department of Biology, University of Leipzig, Germany

10) Department of Biology, Texas State University, San Marcos, Texas 78666, USA

11) Department of Biology, University of New Mexico, Albuquerque, New Mexico, USA

12) Department of Biology, Colorado State University, Fort Collins, Colorado, USA

23 13) Sorbonne Université, Université Paris-Cité, UPEC, IRD, CNRS, INRA, Institute of Ecology  
24 and Environmental Sciences, iEES Paris, Paris, France

25 14) IFEVA, Universidad de Buenos Aires, CONICET, Facultad de Agronomía, Catedra de  
26 Ecología, Buenos Aires, Argentina

27 15) Department of Ecology, Evolution and Behavior, University of Minnesota, St Paul,  
28 Minnesota, USA

29

30 \* Corresponding author's present address: Botany Department, 1000 E. University Ave.

31 University of Wyoming, Laramie, WY 82071

32

33

## 34 Abstract

35 In many grasslands, species with specific traits occupy unique temporal positions within  
 36 communities. Such intra-annual segregation is predicted to be greatest in systems with high  
 37 variability (i.e., seasonality) in precipitation and temperature because fluctuating environmental  
 38 conditions select for species that capitalize on resources at different times. However, because  
 39 most studies on intra-annual community dynamics have been conducted at individual sites,  
 40 relationships between seasonality and intra-annual turnover at global scales have not yet been  
 41 identified. Furthermore, the same characteristics that promote species-specific responses to  
 42 seasonal fluctuations in environmental conditions may also drive species-specific responses to  
 43 global change drivers such as eutrophication. Research provides evidence that eutrophication  
 44 alters inter-annual plant community dynamics yet understanding of how it alters intra-annual  
 45 dynamics remains limited.

46 We used early-season and late-season compositional data collected from 10 grassland  
 47 sites around the world to ask how seasonality in precipitation and temperature as well as nutrient  
 48 enrichment shape intra-annual turnover in plant communities. In addition, we assessed whether  
 49 changes in the abundances of specific functional groups including annual forbs, perennial forbs,  
 50 C3 and C4 graminoids, and legumes underpin compositional differences between early- and late-  
 51 season communities and treatments. We found that temperature seasonality and intra-annual  
 52 turnover were positively related but observed no relationship between precipitation seasonality  
 53 and intra-annual turnover. These results conflict with theoretical predictions from earlier studies  
 54 which suggest precipitation seasonality drives intra-annual turnover in plant communities. In  
 55 addition, nutrient enrichment increased intra-annual turnover; this pattern was underpinned by  
 56 increased replacement of species between early- and late-season communities in fertilized

conditions. This finding mirrors patterns observed at inter-annual scales and suggests fertilization can alter compositional dynamics via similar mechanisms at varied temporal scales. Finally, fertilization reduced the abundance of C4 graminoids and legumes and eliminated intra-annual differences in these groups. In contrast, fertilization resulted in intra-annual differences in C3 graminoids which were not observed in control conditions, and increased abundance of C3 graminoids and annual forbs overall. Our study provides novel insight into how seasonality and nutrient enrichment shape intra-annual grassland dynamics and highlights how discerning these patterns is essential to our understanding of biodiversity in these systems.

**Keywords:** community composition, grasslands, intra-annual climate variability, nutrient enrichment, Nutrient Network, precipitation seasonality, temporal beta-diversity, temporal niche segregation, temperature seasonality

## 69 Introduction

70 The importance of temporal separation of resource use by species, often termed  
 71 “temporal niche segregation”, has been recognized as an important component of species  
 72 coexistence for decades (e.g., Wiens et al. 1977). In many grasslands, species with specific  
 73 strategies optimally utilize resources under different environmental conditions and thus coexist  
 74 by occupying unique temporal positions within communities. For example, in grasslands co-  
 75 dominated by C3 and C4 grasses, C3 grasses grow and set seed primarily in early to mid-season  
 76 and C4 grasses grow and set seed primarily in late season. Similar dynamics occur in  
 77 communities without C3 and C4 grasses present. For example, in temperate European grasslands  
 78 early-season grasses and forbs contribute most to productivity at the beginning of the season,  
 79 whereas late-season grasses contribute most to productivity late in the growing season (e.g.,  
 80 Guimarães-Steinicke et al. 2019, Doležal et al. 2017). Theory suggests that predictable  
 81 fluctuations in environmental conditions (i.e., seasonality) should promote unique temporal  
 82 assemblages of species by allowing different species to capitalize on optimal conditions at  
 83 different times (Tonkin et al. 2017). However, the same characteristics that promote species-  
 84 specific responses to seasonal fluctuations in environmental conditions often drive species-  
 85 specific responses to global change drivers such as eutrophication. For example, subordinate  
 86 forbs and legumes that thrive at different time periods from dominant grasses are often reduced  
 87 in fertilized conditions in European meadows (e.g., Doležal et al. 2017). Research from the last  
 88 several years has elucidated how eutrophication alters inter-annual plant community dynamics  
 89 (e.g., Hautier et al. 2014, Chen et al. 2021). Yet, interactions between global change drivers and  
 90 intra-annual dynamics of plant communities remain largely unexplored (White and Hastings  
 91 2020).

Seasonality in temperature and precipitation may be particularly important drivers of temporal niche segregation, or intra-annual turnover, in plant communities as they influence plant physiology and phenology and modulate ecosystem processes related to water availability and nutrient cycling (Luo et al. 2020). Modeling studies have demonstrated how intra-annual variation in precipitation supports coexistence among plant species with slight ecological differences in germination requirements, growing season length, or seasonal growth activity (Mathias and Chesson 2013). Empirical evidence documenting the influence of seasonality on intra-annual turnover in plant communities mainly comes from studies of desert systems in which winter and summer annuals segregate temporally in response to seasonal fluctuations in precipitation (e.g., Mulroy and Rundel 1977, Guo and Brown 1997). In addition, studies in tropical forests (Sapijanskas et al. 2014) and grasslands (Fargione and Tilman 2005) have demonstrated how within-season niche partitioning enhances complementarity in resource use and coexistence among co-occurring species. However, because these studies have been conducted in individual plant communities, relationships between seasonality and intra-annual turnover at global scales have not yet been identified. In addition, plant communities adapted to seasonal segregation may be changing in composition and structure in response to global change drivers such as eutrophication.

Eutrophication in grasslands leads to reduced plant species richness and diversity (e.g., Hautier et al. 2009, Harpole et al. 2016). Evidence for these patterns has primarily been gathered from studies that measure plant community composition once a year, usually at the peak of biomass production (e.g., Borer et al. 2014). However, research has demonstrated that diverse resource-use strategies allow distinct species assemblages to dominate in different points within a growing season (Doležal et al. 2017, Guimarães-Steinicke et al. 2019, Huang et al. 2019). In

grassland systems, nutrient enrichment may promote the dominance of species with specific traits for longer periods of time and reduce overall turnover among early- and late-season communities (Doležal et al. 2017). Further, the addition of multiple limiting nutrients may reduce the importance of species-specific trade-offs associated with competition for particular nutrients (Harpole et al. 2016) which may be most limiting at different points throughout the growing season (Klaus et al. 2016). Assessing how nutrient enrichment affects compositional turnover between early and late-season assemblages would clarify whether patterns of reduced diversity in response to fertilization at inter-annual scales are underpinned by reduced turnover at intra-annual scales.

Changes in overall diversity in responses to nutrient enrichment often result from changes in the abundance of species that are affected by nutrient enrichment in different ways. For example, nitrogen enrichment reduces the abundance of legumes and nutrient conservative C4 grasses but increases the abundance of nutrient acquisitive C3 grasses (e.g., Suding et al. 2005, Tognetti et al. 2021). Fertilization with multiple nutrients can further alter community composition by causing shifts in the relative abundance of species from specific functional groups (Wilcots et al. 2021). When nutrient enriched communities become dominated by specific species or functional groups, ecosystem stability may be reduced via a loss of asynchronous species responses to environmental fluctuations (Hector et al. 2010, Hautier et al. 2014). In addition, nutrient additions that result in the loss of forb and legume species can have cascading effects on organisms at other trophic levels, such as pollinators, that often depend on these groups for floral resources (Burkle and Irwin et al. 2010, Dyer et al. 2021). Understanding how nutrient enrichment affects the abundances of specific functional groups at specific timepoints in

the growing season (i.e., early vs late) and between timepoints would clarify when compositional changes or shifts in dominance take place and which species drive them.

In this study, we used above-ground species composition data collected early and late in the growing season from 10 grassland sites around the world to assess how seasonality in temperature and precipitation as well as eutrophication influence intra-annual turnover of plant assemblages. The 10 sites are part of the Nutrient Network – a globally replicated experiment in which herbaceous plant communities are supplemented with fertilizer. Data from each site spanned between 4 and 10 years. We used data from untreated plots to assess relationships between precipitation and temperature seasonality (estimates obtained from WorldClim; Fick and Hijmans 2017) and intra-annual compositional turnover across our study sites. We then examined the effects of fertilization on intra-annual turnover and its components of nestedness and replacement. Finally, to determine which species underpin changes in intra-annual turnover in response to fertilization, we assessed overall changes in abundance of different functional groups (i.e., C3 graminoids, C4 graminoids, annual forbs, perennial forbs, legumes) between early and late timepoints and fertilization treatments. Our hypotheses are that:

H1. Sites with high intra-annual variability in temperature and precipitation (i.e., high seasonality) have high intra-annual turnover.

H2. Fertilization decreases intra-annual turnover because a subset of species will dominate across early and late sampling timepoints.

H3. Differences in early-season vs. late-season community composition in response to fertilization are underpinned by increased abundances of resource acquisitive species (e.g., C3 graminoids, annual forbs) and decreased abundances of species with more



conservative strategies (e.g., C4 graminoids, perennial forbs, legumes) within and between specific timepoints (i.e., early vs. late)

## Methods

### *Study design and site locations*

Data for this study were collected from 10 grassland sites from around the world that are part of the Nutrient Network – a globally distributed experiment in which plant communities are supplemented with factorial combinations of nitrogen (N), phosphorous (P), potassium (K) and micronutrients ( $\mu$ ) (Borer et al. 2014). While most Nutrient Network sites collect compositional data once a year, data from this subset of sites is collected twice each growing season (named “early” and “late” hereafter). These sites are distributed across five continents, in Africa (ukul.za), Australia (burrawan.au), Europe (bayr.de, cereep.fr, frue.ch, jena.de), North America (arch.us, temple.us, sevi.us) and South America (chilcas.ar) (Table S1).

Compositional data used in this study were collected from 3 to 5 replicated control and NPK $\mu$  plots at these sites from between 4 (bayr.de) and 11 years (ukul.za) (mean length of experiment is 6.5 years, details in Table S1). Fertilized plots at all sites besides cereep.fr received 10 g m<sup>-2</sup> of N, P, and K annually with a one-time addition of micronutrients; fertilized plots at the cereep.fr site received 2.5 g m<sup>-2</sup> annually with a one-time addition of micronutrients. Despite this different application rate, all results were qualitatively similar whether the cereep.fr site was or was not included in analyses, so we retain it in the results presented here. For additional details about experimental design, please see Borer et al. (2014).

### *Quantifying temperature and precipitation seasonality*

Estimates of temperature and precipitation seasonality for each site were obtained from WorldClim (Fick and Hijmans 2017). Temperature and precipitation seasonality for each site are based on monthly totals of precipitation and temperature where “Temperature seasonality” is the standard deviation of monthly temperature \* 100 and “Precipitation seasonality” is the coefficient of variation of monthly precipitation totals for a given year. In both cases, higher values indicate higher variance or greater fluctuations in temperature and precipitation within a year. We chose to use annual seasonality values rather than growing season values because winter precipitation at some of our sites (e.g., sevi.us) is an important driver of plant community dynamics. Between 18 and 30 years of precipitation and temperature seasonality data were used to obtain average seasonality values for each site based on data availability in WorldClim.

# *Quantifying intra-annual turnover in communities*

Dissimilarity indices are useful tools for measuring differences between communities in space or time. However, dissimilarity indices can be influenced by local community size (i.e.,  $\alpha$ -diversity) and overall richness of species at regional scales (i.e.,  $\gamma$ -diversity) (e.g., Chase and Myers 2011). Deviations from null expectations of dissimilarity (e.g., z-scores) can help determine whether compositional differences, independent of local community size and regional species pools, drive dissimilarity patterns (e.g., Chase and Myers 2011). More specifically, larger z-scores indicate higher dissimilarity between communities, whereas lower deviations indicate lower dissimilarity.

To quantify intra-annual turnover between early and late communities in control and NPK $\mu$  treatments at each site we used deviations from expected values of the Bray-Curtis dissimilarity index (Figure 1). We did this by first permuting species abundances (i.e., absolute values of

species cover) from permanent m<sup>2</sup> survey plots 100 times while holding overall richness and total abundances of species constant within a plot at a given sampling timepoint (i.e., early or late season). We used these 200 permuted communities (i.e., 100 permutations for “early” communities and 100 permutations for “late” communities) to obtain mean and standard deviation values for expected (i.e., null) dissimilarity in each plot. We then calculated z-scores for each early-to-late comparison for each plot, year, and treatment combination using the following formula:  $Turnover_z = \frac{BC_{observed} - \mu_{null}}{\sigma_{null}}$  where  $BC_{observed}$  is the observed Bray-Curtis value from each plot in each year,  $\mu_{null}$  is the expected mean for each plot in each year obtained from the distribution of permutation dissimilarity estimates, and  $\sigma_{null}$  is the variance for each plot in each year obtained from the distribution of permutation dissimilarity estimates (Figure 1b). We used these z-scores (indicated throughout as  $turnover_z$ ) as our estimates of early to late dissimilarity from each plot in each year, hereafter referred to as “intra-annual turnover”. Comparisons from a given plot in a given year with less than four species at either the early or late sampling time point were removed prior to all analyses because communities with less than four species could not produce sufficient permutations to calculate reliable estimates of  $turnover_z$ . This resulted in the exclusion of 53 early-to-late comparisons from 888 comparisons total (i.e., 835 comparisons were included in analyses).

We also decomposed observed Bray-Curtis dissimilarity from each early-to-late comparison for each plot, year, and treatment into components of species “replacement” and “nestedness” (Baselga 2009). Nestedness captures the component of dissimilarity that results from one community being a subset of another community, whereas replacement captures the component of dissimilarity that results from certain species being lost and others gained between compared

communities. We used the beta.part package (Baselga and Orme 2012) to obtain all dissimilarity estimates.

# *Statistical models*

We used two separate linear regression models to assess relationships between temperature and precipitation seasonality and intra-annual turnover of plant communities. In these models, average site temperature seasonality or precipitation seasonality values were included as a continuous predictor and average turnover<sub>z</sub> estimates from control treatments from each site were included as a continuous response. We examined how NPK<sub>μ</sub> treatment influenced intra-annual turnover using a multilevel regression model with plot-level turnover<sub>z</sub> values included as response variables, treatment as a predictor, and a random effect of block, nested within treatment year, nested within site. Because not all functional groups are present at all sites, functional group analyses were completed using data from sites that had specific functional groups present at >1% cover overall. We fit five separate multilevel regression models to quantify how abundance of specific functional groups (i.e., summed cover of all species belonging to annual forbs, perennial forbs, C3 grasses, C4 grasses and legumes from m<sup>2</sup> plots) differed among early and late sampling timepoints and treatments. These models included treatment by season combinations as categorical predictors (i.e., control\_early, control\_late, NPK<sub>μ</sub>\_early, NPK<sub>μ</sub>\_late) and block nested within treatment year nested within site as a random effect (i.e., interactions were not assessed prior to investigating differences in means).

For Bayesian inferences and estimates of uncertainty, all models described were fitted using the Hamiltonian Monte Carlo (HMC) sampler using Stan (Carpenter et al. 2017) and coded using the ‘brms’ package (Bürkner et al. 2018) in R (version V.2.1 R Core Development Team).

All models were fit with 4 chains and 3000 iterations (Table S2). We used default priors for all models in which dissimilarity estimates (i.e., turnover<sub>z</sub>, nestedness, replacement) were included as response variables. In models assessing differences in functional group abundances between timepoints and treatments, default priors were used for C3 and C4 graminoid and perennial forb models, whereas weakly regularizing priors were used in models assessing differences in legume and annual forb abundances (Table S2). We inspected the HMC chains to assess model convergence. For all models, we estimated the significance of effects by computing the difference between posterior distributions of interest and assessing whether the 90% credible interval of the difference contained zero.

## Results

We found a positive relationship between temperature seasonality and seasonal turnover in unfertilized control plots (Slope: 0.0028, 90% Credible Interval (CI): 0.0004 to 0.0050) (Figure 2a) and no relationship between precipitation seasonality and seasonal turnover (Slope: -0.0052, CI: -0.0278 to 0.0166) (Figure 2b). Contrary to our hypothesis, we detected a significant positive effect of fertilization on seasonal turnover<sub>z</sub> across sites (Figure 3). This result indicates greater dissimilarity in fertilized conditions, even after accounting for differences in richness between the two treatments (average number of species per m<sup>2</sup> in control: 12.8; average number of species per m<sup>2</sup> in NPK<sub>μ</sub>: 11.5). However, turnover<sub>z</sub> values were negative in most cases, indicating lower than expected dissimilarity between early-season and late-season communities. After decomposing observed (i.e., Bray-Curtis) intra-annual turnover into components of nestedness and replacement, we found no differences between treatments in nestedness (Figure 4a) but higher replacement in fertilized conditions than in controls (Figure 4b).

The effects of fertilization varied by functional group and between early and late sampling timepoints (Figure 5). At both sampling timepoints, fertilization resulted in higher cover of annual forbs (Figure 5a) and C3 graminoids (Figure 5c) and lower cover of C4 graminoids (Fig. 5d) and legumes (Fig. 5e). Perennial forb cover was reduced with fertilization, but only at the late sampling timepoint (Fig. 5b). Patterns of functional group abundances between early and late sampling points also varied between control and fertilized treatments. In control but not fertilized treatments, C4 graminoid abundance was higher at the later sampling point compared to early in the season and legume abundance was higher early in the season compared to late in the season. In contrast, abundance of C3 graminoids was higher early in the season compared to late in the season but only in fertilized treatments.

## Discussion

Contrary to most empirical and theoretical studies to date (e.g., Mulroy and Rundel 1977, Mathias and Chesson 2013), we found temperature seasonality, not precipitation seasonality, to be positively related to intra-annual compositional turnover across our study sites. We suspect this relationship arises due to differences in annual systems, from which most evidence to date has been gathered, and the predominantly perennial systems in our study. In annual systems, population, community, and ecosystem dynamics are often governed by interactions between intra-annual precipitation patterns and demographic traits related to dormancy and germination (e.g., Levine et al. 2011, Kimball et al. 2011, Shaw et al. 2022). In addition, in systems co-dominated by annuals and perennials, intra-annual variability in precipitation is often necessary for the persistence of annuals that occupy unique temporal niches in communities (e.g., Pérez-Camacho et al. 2012). If precipitation is highly seasonal, distinct assemblages of annual species may be promoted early vs. late in the growing season. On the other hand, temperature and

temperature seasonality may be more important drivers of intra-annual dynamics in perennial systems because temperature is a key driver of species physiology which drives species temporal segregation in many perennial systems (e.g., Kemp and Williams. 1980, Monson et al. 1983). Given the low abundance of annual cover across our study sites (*c.* 11%), we are not able to test these patterns robustly. But a positive, non-significant, relationship between annual species dissimilarity and precipitation seasonality (Supplementary Figure 1a) and a negative, non-significant, relationship between perennial species dissimilarity and precipitation seasonality (Supplementary Figure 1b) invite new questions about how precipitation seasonality influences intra-annual community dynamics across diverse ecosystems. Studies that explicitly manipulate precipitation seasonality across systems varying in temperature seasonality could help clarify how interactions between these two understudied components of climate change shape plant communities.

The negative impacts of nutrient enrichment on grassland diversity have been extensively documented (e.g., Borer et al. 2017) and recent studies have identified higher turnover of species at inter-annual scales with nutrient addition (Koerner et al. 2016, Hodapp et al. 2018, Chen et al. 2021). Mirroring these results at intra-annual scales, we found that fertilization resulted in higher intra-annual turnover in community composition, despite lower richness in fertilized communities. Because we used deviations from null expectations as our response, we can be confident that these shifts arise from true changes in composition rather than random processes influenced by richness. Similar to results found at inter-annual scales (Chen et al. 2021), we found that higher turnover with fertilization was driven by higher replacement of species, and not nestedness of species, between early and late-season communities. This suggests that fertilization increases temporal turnover among and within years by similar mechanisms, namely by unique

species occupying space within the community at different times (i.e., replacement) rather than species being lost from one timepoint to another (i.e., nestedness). At inter-annual scales, increased turnover and species replacement through time can result in reduced stability of ecosystem productivity (e.g., Koerner et al. 2016, Chen et al. 2021). Additional research focused on how nutrient enrichment alters composition and associated ecosystem functions within growing seasons would clarify whether similar patterns manifest at intra-annual scales.

As expected, fertilization resulted in higher abundance of resource acquisitive species (i.e., C3 graminoids, annual forbs) and lower abundance of resource conservative species (i.e., C4 graminoids, legumes, perennial forbs) within and across sampling timepoints. Numerous other studies have documented similar patterns at single timepoints (e.g., Suding et al. 2005, Isabell et al. 2013, Wilcots et al. 2021, Tognetti et al. 2021) and results are primarily attributed to physiological differences between these groups and concomitant shifts from below-ground competition for nutrients to aboveground competition for light (e.g., Borer et al. 2014, Harpole et al. 2017). Among other anatomical and physiological differences, compared to C4 species, C3 species (i.e., most of the annuals in our study and C3 graminoids) generally have lower C:N ratios (e.g., Wedin and Tilman 1990), lower water and photosynthetic nitrogen use efficiencies (Black 1971, Taylor et al. 2011, Ripley et al. 2010), and earlier phenologies due to lower optimal temperatures for photosynthesis (Kemp and Williams 1980). These characteristics can lead to higher sensitivities of resource acquisitive species to nutrient limitation which allow them to increase in fertilized conditions (e.g., Zhong et al. 2019).

Fertilization made apparent seasonal differences in C3 graminoid abundance that were not present under control, while eliminating seasonal differences in abundance of C4 graminoids and legumes that were present in control treatments. Higher C3 graminoid abundance early in the



season in fertilized treatments could reflect a higher capacity for growth of these species early in the season, when resources are abundant, followed by more pronounced declines later in the season when resources are scarce (e.g., Yuan et al. 2007). In contrast, both C4 graminoids and legumes are adapted to resource-limited conditions which can vary throughout growing seasons (Klaus et al. 2014). By altering resource conditions, fertilization likely modulates the low-resource periods during which these species thrive resulting in lower abundances of these species overall and homogenization of these groups across the growing season.

Our understanding of how grasslands respond to various components of global change is primarily based on studies that document community shifts at inter-annual scales. However, global changes may also disrupt within-season community dynamics. Here we show that intra-annual turnover of species across 10 global grasslands is related to temperature seasonality, not precipitation seasonality as predicted by previous studies. Given that both temperature and precipitation seasonality are expected to change in coming decades (Xu et al. 2013, Hajek and Knapp 2021) additional research that explicitly manipulates seasonality is needed to clarify how these understudied components of global change alter plant communities. In addition, we show that nutrient enrichment increases intra-annual turnover in grasslands via increased replacement of species between seasons. The resulting community shifts are underpinned by changes in abundance of specific functional groups. Namely, fertilization increases abundances of resource-acquisitive species (i.e., annual forbs, C3 graminoids) and decreases abundances of resource-conservative species (i.e., C4 graminoids, legumes) within and between early and late sampling timepoints. In addition, fertilization results in homogenization of abundances of resource conservative species early to late in the growing season. If the effects of intra-annual community change mirror those at inter-annual scales, the community shifts we observed in our study could

have cascading effects on ecosystem stability, multifunctionality, and the ability of these systems to recover from future perturbations. Our study provides novel insight into how seasonality and nutrient enrichment shape within-season community dynamics in global grasslands and highlights how discerning these patterns is essential to our understanding of biodiversity in these valuable ecosystems.

**Acknowledgements:** Funding for this project was provided by the German Science Foundation (DFG; via University Leipzig/iDiv) for the project “Strategisches Projekt: NEu – Nutrient Network Europe” (Projektnummer 346001057-03).

**Author contributions:** MG and SH conceptualized this project, MG completed analyses with assistance from HH, SJ, and EL, MG wrote the manuscript, all authors contributed to data collection and editing the manuscript.

## References:

- Baselga, A. (2009) Partitioning the turnover and nestedness components of beta-diversity. *Global Ecology and Biogeography*. **19** (1) 134 - 143
- Baselga, A & Orme D.L. (2012) betapart: an R package for the study of beta diversity. *Methods in Ecology and Evolution* **3**, 808-812
- Borer, E. T. et al. (2014) Herbivores and nutrients control grassland plant diversity via light limitation. *Nature* **508**, 517–520
- Borer, E.T., Grace, J.B., Harpole, W.S., MacDougall, A.S., Seabloom, E.W. (2017) A decade of insights into grassland ecosystem responses to global environmental change. *Nature Ecology & Evolution* **1**, 0118
- Burkle L.A. & Irwin R.E. (2010) Beyond biomass: measuring the effects of community-level nitrogen enrichment on floral traits, pollinator visitation and plant reproduction. *Journal of Ecology*. **98** (3), 705 – 717
- Bürkner P.C. (2017) “brms: An R Package for Bayesian Multilevel Models using Stan.” *Journal of Statistical Software*, 80(1), 1–28
- Carpenter B., Gelman A., Hoffman M.D., et al. (2017) Stan: a probabilistic programming language. *Journal of Statistical Software*. **76** (1)
- Chase, J. M. & Myers, J. A. (2011) Disentangling the importance of ecological niches from stochastic processes across scales. *Philosophical Transactions Royal Soc B Biological Sci* **366**, 2351–2363
- Chen, Q. et al. (2022) Nutrients and herbivores impact grassland stability across spatial scales through different pathways. *Global Change Biol* **28**, 2678–2688
- Doležal, J., Lanta, V., Mudrák, O. & Lepš, J. (2019) Seasonality promotes grassland diversity: Interactions with mowing, fertilization and removal of dominant species. *J Ecol* **107**, 203–215
- Dyer, A.G., Jentsch, A., Burd, M., Garcia, J.E., Giejsztowt, J., Camargo, M.G.G., Tjörve, E., Tjörve, K.M.C., White, P.S., Shrestha, M. (2021) Fragmentary blue: Resolving the rarity paradox in flower colours. *Frontiers in Plant Science* 11: Article 618203
- Ehleringer, J. & Pearcy, R. W. (1983) Variation in Quantum Yield for CO<sub>2</sub> Uptake among C(3) and C(4) Plants. *Plant Physiol* **73**, 555–9
- Fargione, J. & Tilman, D. (2005) Niche differences in phenology and rooting depth promote coexistence with a dominant C4 bunchgrass. *Oecologia* **143**, 598–606

- Fick S.E. & Hijmans, R.J. (2017) WorldClim 2: new 1-km spatial resolution climate surfaces for global land areas. *International Journal of Climatology*. **37**, 4302–4315
- Guimarães-Steinicke, C., Weigelt, A., Ebling, A., Eisenhauer, N., Duque-Lazo, L., Reu, B., Roscher, C., Schumacher, J., Wagg, C., Wirth, C. (2019) Terrestrial laser scanning reveals temporal changes in biodiversity mechanisms driving grassland productivity. *Advances in Ecological Research* **61**, 133-161
- Hajek, O. L. & Knapp, A. K. (2022) Shifting seasonal patterns of water availability: ecosystem responses to an unappreciated dimension of climate change. *New Phytol* **233**, 119–125
- Harpole, W. S. et al. (2016) Addition of multiple limiting resources reduces grassland diversity. *Nature* 1–9
- Harpole, W. S. et al. (2017) Out of the shadows: multiple nutrient limitations drive relationships among biomass, light and plant diversity. *Functional Ecology* **31**, 1839–1846
- Hautier, Y., Niklaus, P. A. & Hector, A. (2009) Competition for Light Causes Plant Biodiversity Loss After Eutrophication. *Science* **324**, 636–638
- Hautier, Y., Seabloom E., Borer E., et al. (2014) Eutrophication weakens stabilizing effects of diversity in natural grasslands. *Nature* **508**, 521 – 525
- Hector, A. Hautier, Y., Wacker S.L., et al. (2010) General stabilizing effects of plant diversity on grassland productivity through population asynchrony and overyielding. *Ecology* **91** (8), 2213 – 2220
- Hodapp, D. (2018) *et al.* Spatial heterogeneity in species composition constrains plant community responses to herbivory and fertilisation. *Ecology Letters* **21**, 1364–1371
- Huang, L., Xue, W. & Herben, T. (2019) Temporal niche differentiation among species changes with habitat productivity and light conditions. *Journal of Vegetation Science* **30**, 438–447
- Guo, Q., & J. H. Brown. (1997) Interactions between winter and summer annuals in the Chihuahuan desert. *Oecologia* 111:123–128.
- Isabell, F. *et al.* (2013) Nutrient enrichment, biodiversity loss, and consequent declines in ecosystem productivity. *Proc National Acad Sci* **110**, 11911–11916
- Kemp, P. R. & Williams, G. J. A (1980) Physiological Basis for Niche Separation Between *Agropyron Smithii* (C3) and *Bouteloua Gracilis* (C4). *Ecology* **61**, 846–858
- Klaus, V.H. et al. (2016) Temporal and small-scale spatial variation in grassland productivity, biomass quality, and nutrient limitation. *Plant Ecology*. **217**, 843 – 856

- Koerner, S. E. et al. (2016) Nutrient additions cause divergence of tallgrass prairie plant communities resulting in loss of ecosystem stability. *J Ecol* **104**, 1478–1487
- Luo, Y. et al. (2020) Nutrients and water availability constrain the seasonality of vegetation activity in a Mediterranean ecosystem. *Global Change Biol.*
- Mathias, A. & Chesson, P. (2013) Coexistence and evolutionary dynamics mediated by seasonal environmental variation in annual plant communities. *Theor Popul Biol* **84**, 56–71
- Monson, R. K., Littlejohn, R. O. & Williams, G. J. (1983) Photosynthetic adaptation to temperature in four species from the Colorado shortgrass steppe: a physiological model for coexistence. *Oecologia* **58**, 43–51
- Mulroy, T. W. & Rundel, P. W. (1977) Annual Plants: Adaptations to Desert Environments. *Bioscience* **27**, 109–114
- Myers, J. A. et al. (2013) Beta-diversity in temperate and tropical forests reflects dissimilar mechanisms of community assembly. *Ecol Lett* **16**, 151–157
- Myers, J. A., Chase, J. M., Crandall, R. M. & Jiménez, I. (2015) Disturbance alters beta-diversity but not the relative importance of community assembly mechanisms. *J Ecol* **103**, 1291–1299
- Pérez-Camacho L., Rebello, S., Hernández-Santana, V., García-Salgado, J., Pavón-García, J., Gómez-Sal., A. (2012) Plant functional trait responses to interannual rainfall variability, summer drought and seasonal grazing in Mediterranean herbaceous communities. *Functional Ecology* **26**, 740 – 749
- Ripley, B., Frole, K. & Gilbert, M. (2010) Differences in drought sensitivities and photosynthetic limitations between co-occurring C3 and C4 (NADP-ME) Panicoid grasses. *Ann Bot-london* **105**, 493–503
- Sapijanskas, J., Paquette, A., Potvin, C., Kunert, N. & Loreau, M. (2014) Tropical tree diversity enhances light capture through crown plasticity and spatial and temporal niche differences. *Ecology* **95**, 2479–2492
- Schofield, E. J., Rowntree, J. K., Paterson, E. & Brooker, R. W. (2018) Temporal Dynamism of Resource Capture: A Missing Factor in Ecology? *Trends in Ecology & Evolution* **33**, 277–286
- Suding, K. N. et al. (2005) Functional- and abundance-based mechanisms explain diversity loss due to N fertilization. *Proceedings of the National Academy of Sciences* **102**, 4387–4392
- Taylor, S. H. et al. (2014) Physiological advantages of C4 grasses in the field: a comparative experiment demonstrating the importance of drought. *Global Change Biol* **20**, 1992–2003
- Tognetti, P. M. et al. (2021) Negative effects of nitrogen override positive effects of phosphorus on grassland legumes worldwide. *Proc National Acad Sci* **118**

- 507 Tonkin, J. D., Bogan, M. T., Bonada, N., Rios-Touma, B. & Lytle, D. A. (2017) Seasonality and
- 508 predictability shape temporal species diversity. *Ecology* **98**, 1201–1216
- 509
- 510 Wedin, D. A. & Tilman, D. (1990) Species effects on nitrogen cycling: a test with perennial
- 511 grasses. *Oecologia* **84**, 433–441
- 512
- 513 White, E. R. & Hastings, A. (2020) Seasonality in ecology: Progress and prospects in theory.
- 514 *Ecol Complex* **44**, 100867
- 515
- 516 Wiens, J. A. (1977) On competition and variable environments: Populations may experience
- 517 “ecological crunches” in variable climates, nullifying the assumptions of competition theory and
- 518 limiting the usefulness of short-term studies of population patterns. *American Scientist*
- 519
- 520 Wilcots, M. E., Harpole, W. S., Seabloom, E. W. & Borer, E. T. (2021) Community change can
- 521 buffer chronic nitrogen impacts, but multiple nutrients tip the scale. *Ecology* **102**
- 522
- 523 Xu, L., Myneni R.B., Chapin F.S., et al. (2013) Temperature and vegetation seasonality
- 524 diminishment over northern lands. *Nature*. **3**, 581 – 586
- 525
- 526 Yuan, Z., Liu, W., Niu, S. & Wan, S. (2007) Plant Nitrogen Dynamics and Nitrogen-use
- 527 Strategies under Altered Nitrogen Seasonality and Competition. *Ann Bot-london* **100**, 821–830
- 528
- 529 Zhong, S. *et al.* (2019) Nitrogen Addition Increases the Sensitivity of Photosynthesis to Drought
- 530 and Re-watering Differentially in C3 Versus C4 Grass Species. *Front Plant Sci* **10**, 815
- 531

## Figures:

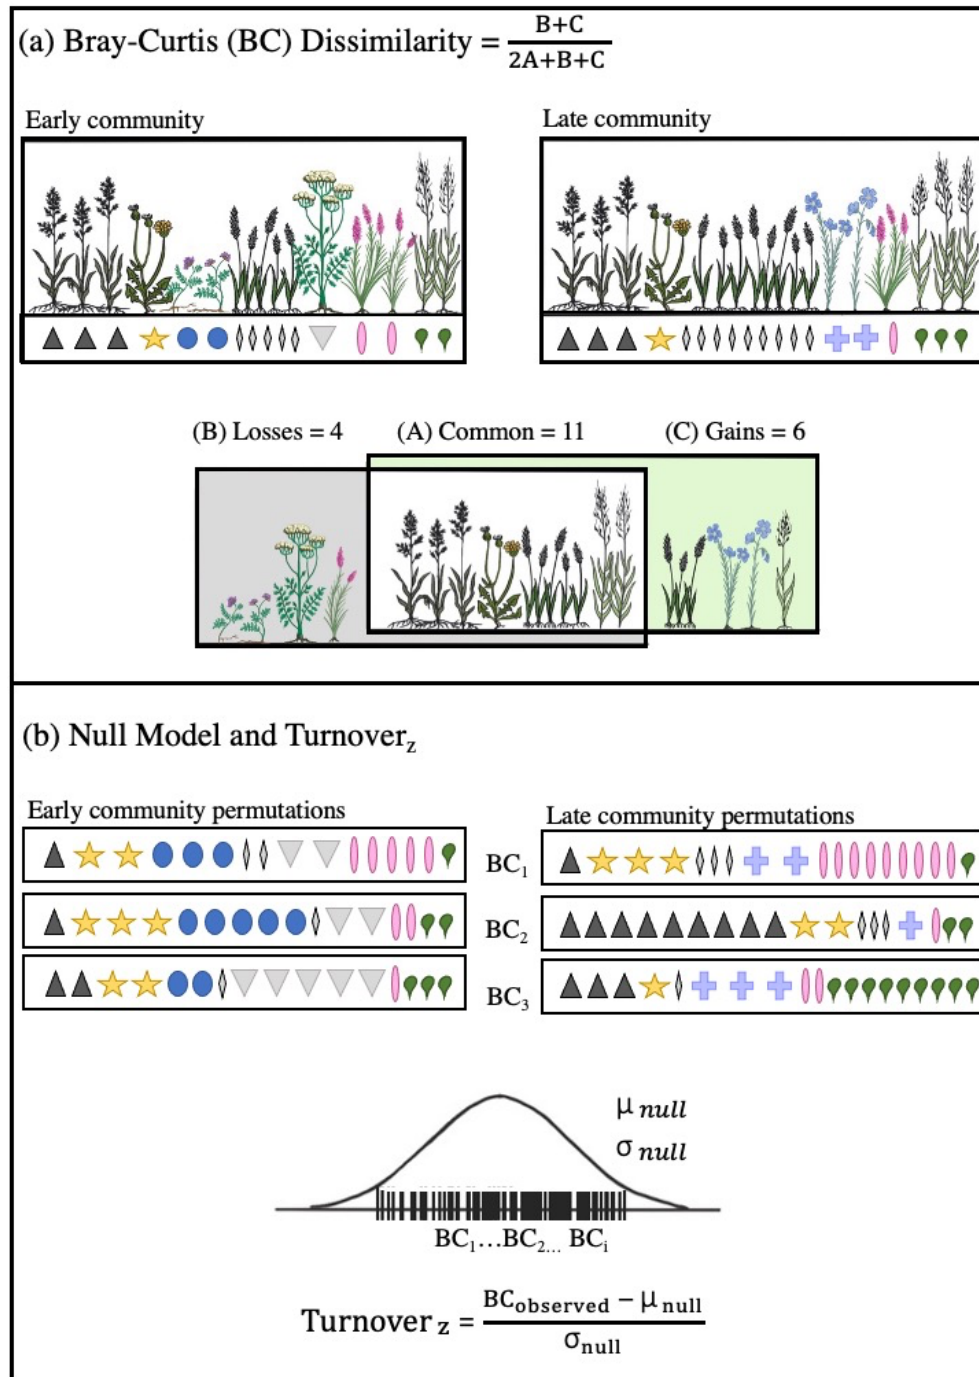



**Figure 1:** Panel a) Bray-Curtis dissimilarity is calculated using the formula  $\frac{B+C}{2A+B+C}$  where B denotes species lost from the early to late community, C denotes species gained from the early to late community, and A denotes shared species between the two communities. Panel b) Null expectations of dissimilarity are obtained by permuting species abundances n number of times (3 times shown) while holding richness and total abundance within communities constant and calculating Bray-Curtis dissimilarity from these permuted communities. These values provide a distribution from which null mean ( $\mu_{null}$ ) and variance ( $\sigma_{null}$ ) values of dissimilarity are estimated. Deviation (i.e., z-scores,  $Turnover_z$ ) values are then obtained using the following formula:  $Turnover_z = \frac{BC_{observed} - \mu_{null}}{\sigma_{null}}$  where  $BC_{observed}$  is the observed Bray-Curtis value from each early to late comparison,  $\mu_{null}$  is the expected mean from the distribution of permutation comparisons, and  $\sigma_{null}$  is the variance from the distribution of permutation comparisons. Symbols in both panels represent species.



Figure 2

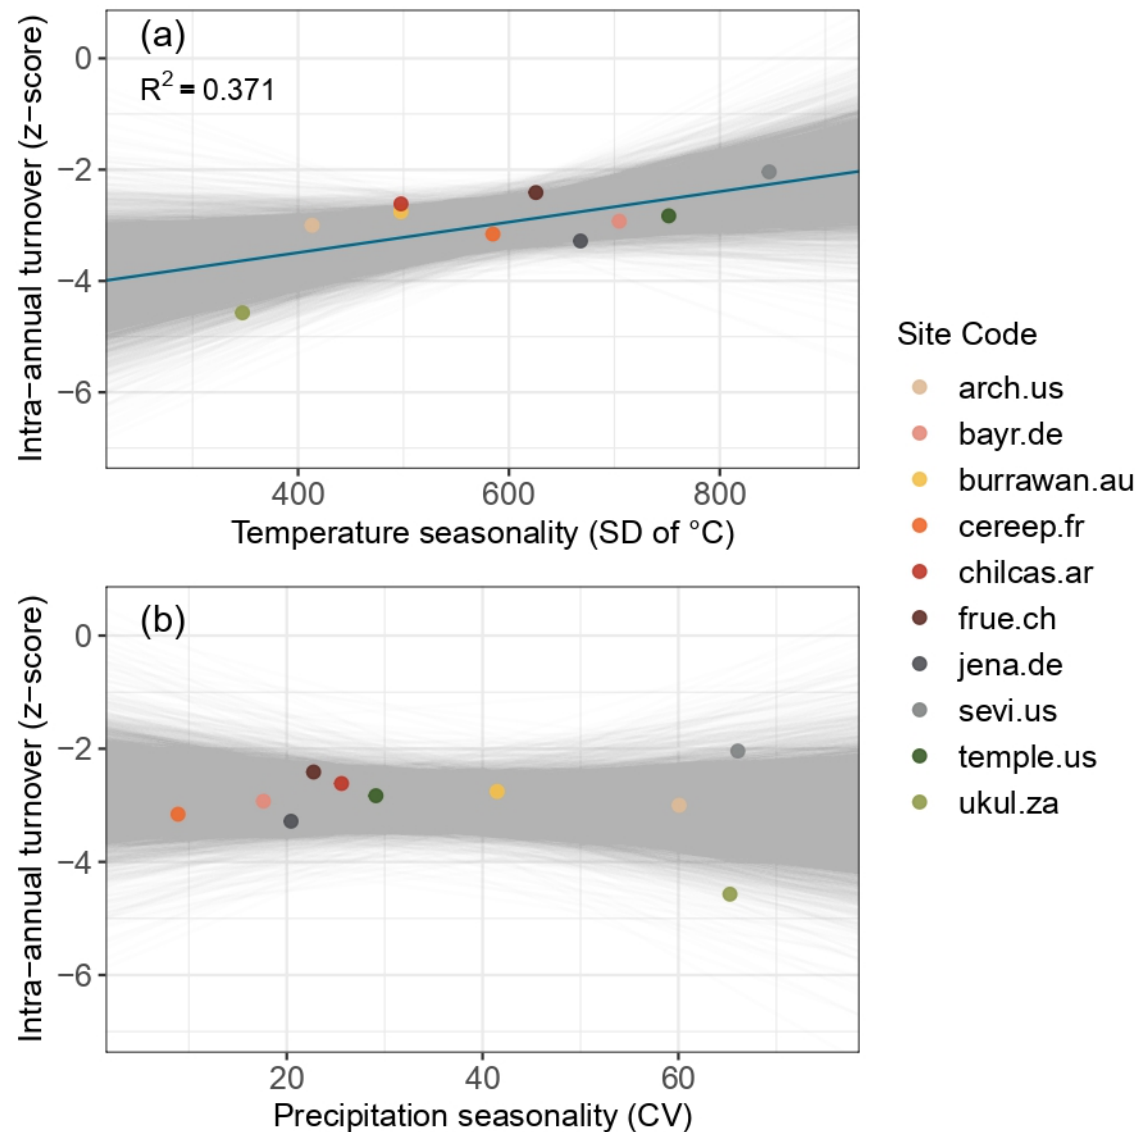

**Figure 2:** Relationships between temperature (panel a) and precipitation (panel b) seasonality and mean intra-annual turnover in control treatments. Gray lines show 500 predicated relationships from posterior model estimates and dark blue lines show averages of these expectations when the distribution of the slope estimate differed from zero at the  $\alpha = 0.1$  probability level.

Figure 3

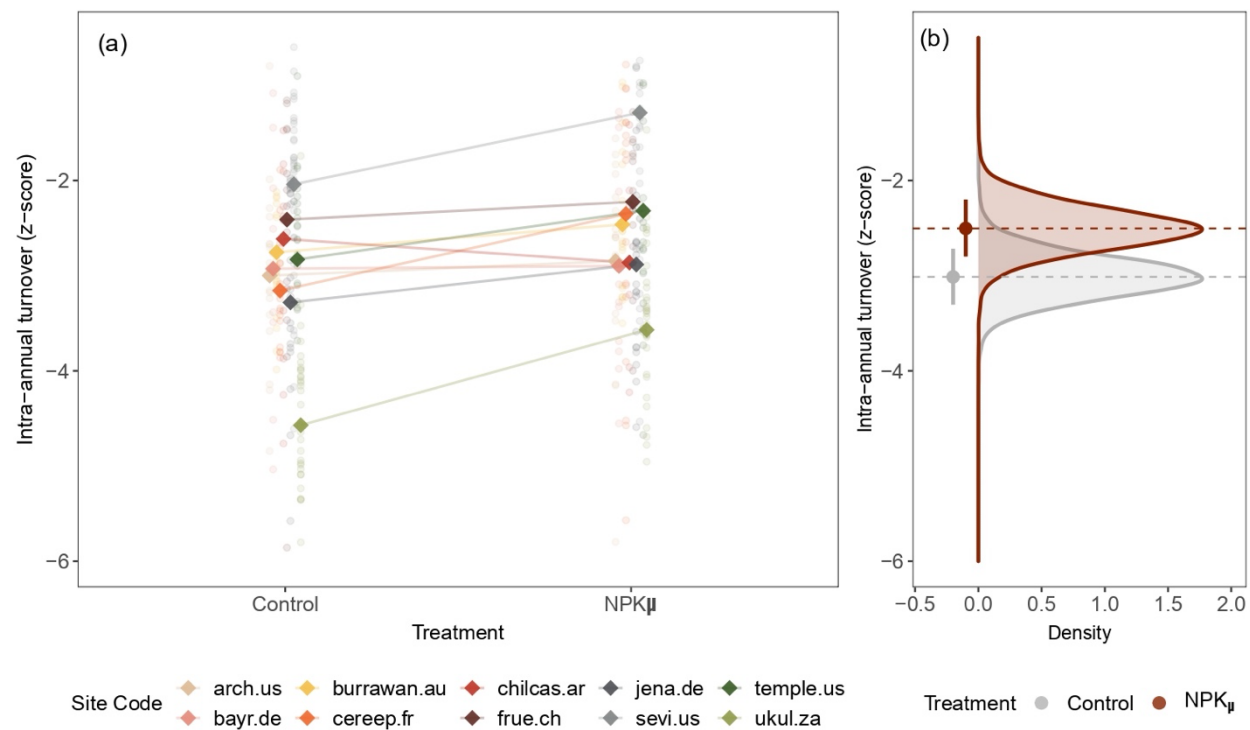

**Figure 3:** Panel a) Intra-annual turnover in control and fertilized (i.e., NPKμ) treatments. Circle points are turnover z-scores (i.e., deviations from null expectations) from each plot in each year for a given site (different colors) and diamond points are average site-level turnover estimates for each site in each treatment. Panel b) Posterior distributions of intra-annual turnover in control and NPKμ treatments across all sites and years included in analyses. Horizontal lines and points denote estimated means and error bars denote 90% credible intervals of the distributions.

Figure 4

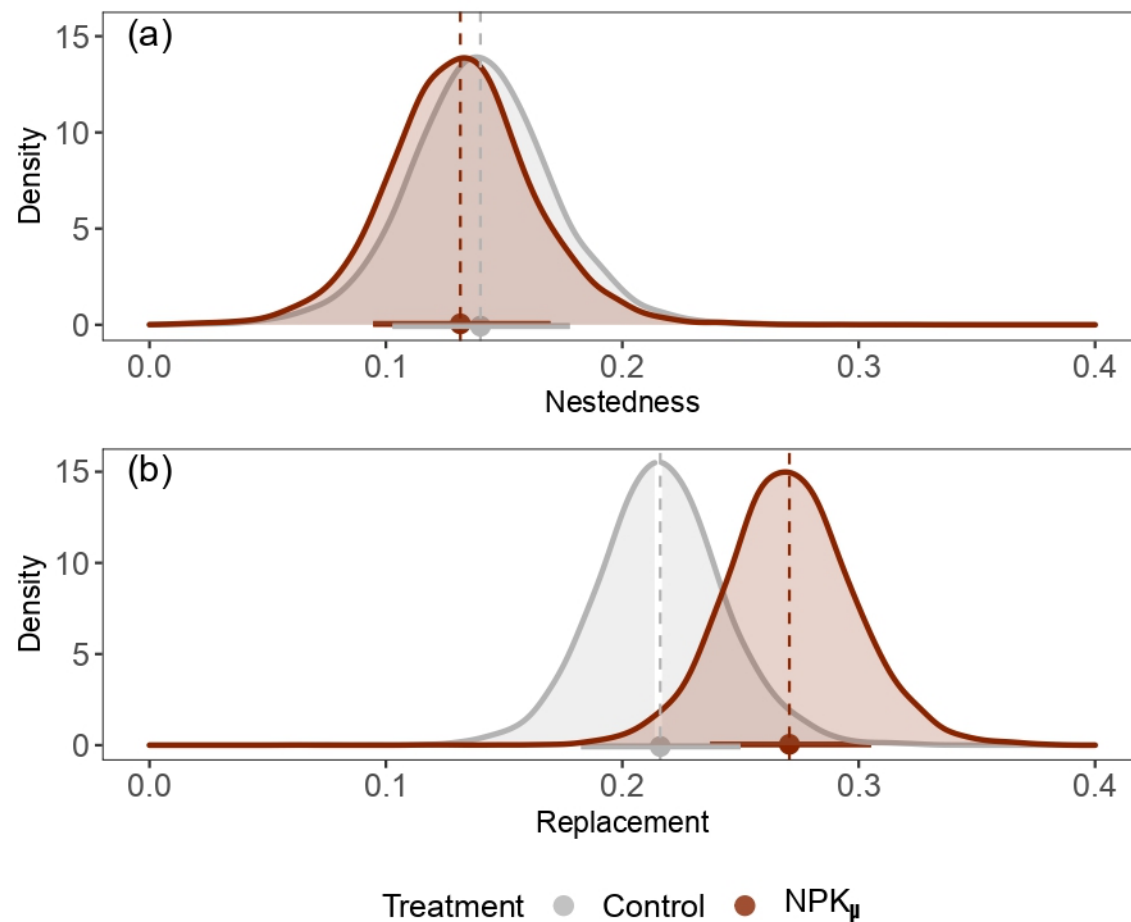

**Figure 4:** Posterior distributions of nestedness (panel a) and replacement (panel b) components of Bray-Curtis dissimilarity in control and fertilized (i.e., NPK) treatments across all sites and years included in analyses. Points and vertical lines denote estimated means and horizontal line segments denote 90% credible intervals of the distributions.

Figure 5

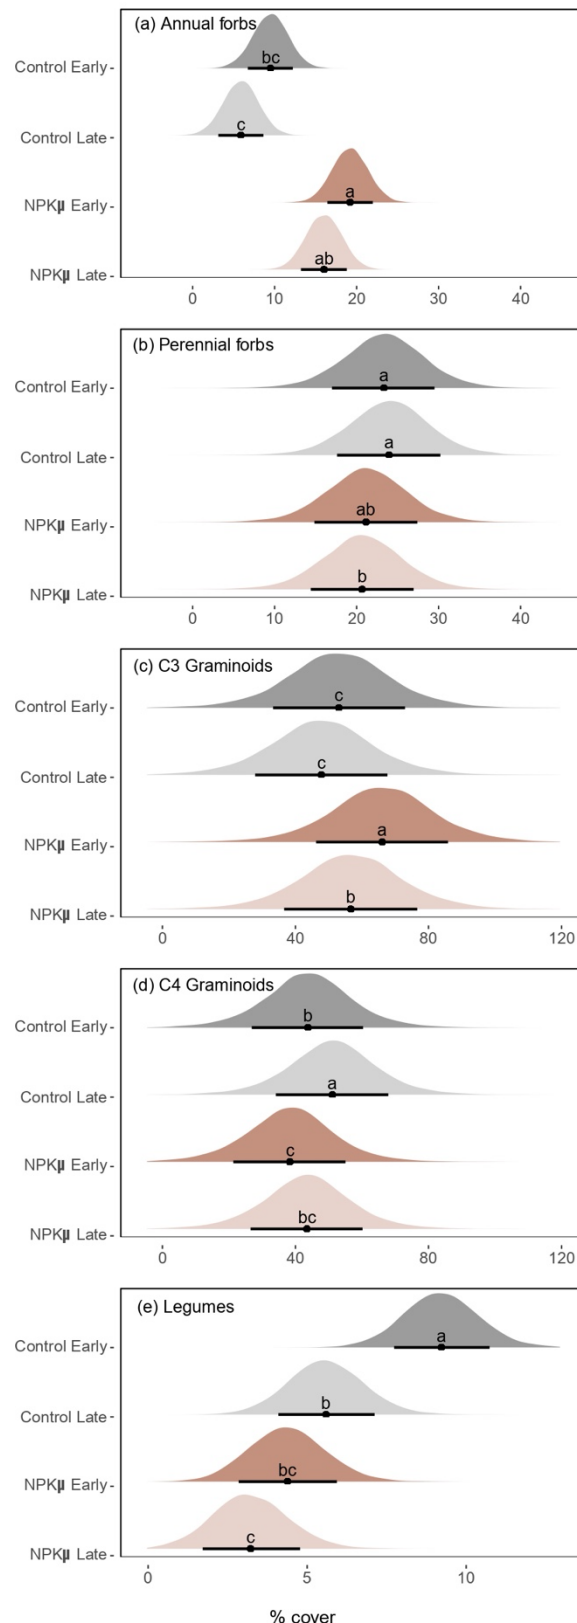

**Figure 5:** Posterior distributions of annual forbs (panel a, 6 sites included in analyses), perennial forbs (panel b, 10 sites included in analyses), C3 graminoids (panel c, 6 sites included in analyses), C4 graminoids (panel d; 6 sites included in analyses), and legumes (panel e; 8 sites included in analyses) early (dark colors) and late (light colors) in the growing season in control (grey) and fertilized (red) treatments. Different letters denote differences between groups at the  $\alpha = 0.1$  probability level, points denote mean estimates, and horizontal line segments denote 90% credible intervals of the distributions. Please note the different scales on the x-axes.
